# Supplementary material
Source: publisher figshare collection journal article supplement (https://gsajournals.figshare.com/ndownloader/files/12482267)
Supplement: Supplementary file 1 [file 12482267]

**Table S1: List of primers used for screening for accessory chromosomes in *Z. tritici* and *Z. ardabiliae*.**

| **Primer name** | **Sequence (5’ to 3’)** | **Coordinates** | **Expected PCR product length (bp)** |
| --- | --- | --- | --- |
| **Telomere L** |  |  |  |
| oES2084_Tel**14**L_F | TCGACCGAGGGTCAGAGATT | 52785.. 52804 | 150 |
| oES2085_Tel**14**L_R | GTGCGAACCGACATCCACTA | 52934.. 52915 |
| oES2088_Tel**15**L_F | AGACGAAGGCACCACCAGAT | 29301.. 29320 | 253 |
| oES2089_Tel**15**L_R | GTGCATCCTCATCCCCCTTA | 29553.. 29534 |
| oES2092_Tel**16**L_F | TCGGAAACACCGGTCTAAGC | 25143.. 25162 | 344 |
| oES2093_Tel**16**L_R | ATAGAGGCGGTCGACGAGAA | 25486.. 25467 |
| oES2096_Tel**17**L_F | GGCTTCTGCCATCAGAGCTT | 88346.. 88365 | 451 |
| oES2097_Tel**17**L_R | CAACTTCCTCCGCTTTGCTC | 88796.. 88777 |
| oES2100_Tel**18**L_F | GTTTTCTCCCTGCACCTTGC | 14259.. 14278 | 540 |
| oES2101_Tel**18**L_R | TATGGCACCTCCGAACAATG | 14798.. 14779 |
| oES2104_Tel**19**L_F | CAAGACGGCTCCCTTTCATC | 19008.. 19027 | 652 |
| oES2105_Tel**19**L_R | AGGAGGAACCATCGAAGCAG | 19659.. 19640 |
| oES2108_Tel**20**L_F | CGGTTCAGATCAGGTGCAAA | 6803.. 6822 | 743 |
| oES2109_Tel**20**L_R | CGTGGAAGAGCATCGACAAG | 7545.. 7526 |
| oES2112_Tel**21**L_F | GTCCAGCCATCGATTTTCGT | 46192.. 46211 | 849 |
| oES2113_Tel**21**L_R | GTCGGGATATGTGCGAGTGA | 47040.. 47021 |
| **Telomere R** |  |  |  |
| oES2086_Tel**14**R_F | CTCCGCTTTGCTTTCCGTAG | 722989..723008 | 896 |
| oES2087_Tel**14**R_R | GTCCGCAAGTGACAAATCCA | 723884..723865 |
| oES2090_Tel**15**R_F | CTACCGCTCGGTTCCAAAAG | 581237..581256 | 799 |
| oES2091_Tel**15**R_R | TTGGGAAACTGTCCTGACCA | 582035..582016 |
| oES2094_Tel**16**R_F | CCAGATTTGGGAATGGGTGT | 587178..587197 | 704 |
| oES2095_Tel**16**R_R | GCTGACGAACTGCTCGAAGA | 587881..587862 |
| oES2098_Tel**17**R_F | AGGTGGTGGATTCGGGATTA | 554580..554599 | 601 |
| oES2099_Tel**17**R_R | CTGCATGCTCTCGATTACGC | 555180..555161 |
| oES2102_Tel**18**R_F | GAGAATGTGGTCGCGGAGAT | 521319..521338 | 500 |
| oES2103_Tel**18**R_R | GAGCCCTTCACCAACACACA | 521818..521799 |
| oES2106_Tel**19**R_F | ACATCCTCCACTCGGCTTGT | 531276..531295 | 398 |
| oES2107_Tel**19**R_R | AGCTACGACGCCATCACCTT | 531673..531654 |
| oES2110_Tel**20**R_F | GGCACCAACTGCACATGATT | 437575..437594 | 292 |
| oES2111_Tel**20**R_R | ACATGCGAGCTGGATCTGAA | 437866..437847 |
| oES2114_Tel**21**R_F | TTGCAGCTCTTGGAGCGATA | 379214..379233 | 202 |
| oES2115_Tel**21**R_R | CCCAGTCGTAATGGGAAGGA | 379415..379396 |
| **Centromere** |  |  |  |
| oES1986_Chr**21**_F | CCTCGCCACCATGTTATACC | 306266..306285 | 294 |
| oES1987_Chr**21**_R | CGCACCTACAGTCCGAAATC | 306559..306540 |
| oES1988_Chr**20**_F | ATGCGAATTGGAGCAGCTAC | 118378..118397 | 500 |
| oES1989_Chr**20**_R | ATCGACGGTGTGCATCTTAC | 118877..118858 |
| oES2002_Chr**19**_F | ACATGGCATCCTGGATTGTC | 200830..200849 | 697 |
| oES2003_Chr**19**_R | ACGAGCTTCTGTTTCCACTG | 201526..201507 |
| oES1992_Chr**18**_F | CCTTCATGCCGGTGCTTTAC | 188047..188066 | 908 |
| oES1993_Chr**18**_R | GATGCCATCGGTCCATAGTG | 188954..188935 |
| oES1994_Chr**17**_F | CACGAGCGACAAGGACTATC | 385216..385235 | 1204 |
| oES1995_Chr**17**_R | AGTGCCCGAGTTTCAACATC | 386419..386400 |
| oES1996_Chr**16**_F | TGCACTAACGCCTCAACTAC | 300338..300357 | 1501 |
| oES1997_Chr**16**_R | TGGCTCTTTGCACTCAAGAC | 301838..301819 |
| oES1998_Chr**15**_F | TTCGAATGCCGGTCATACAC | 357359..357378 | 1991 |
| oES1999_Chr**15**_R | GCAAACCACGAAGCTTTCTC | 359349..359330 |
| oES2000_Chr**14**_F | AAGTGGAAGCGCCCATAATC | 106407..106426 | 2520 |
| oES2001_Chr**14**_R | GACCTCACTTCGCCACATAG | 108926..108907 |
| **Za17** |  |  |  |
| oES2399_unitig**24**_F | TCGGACTAGGAGACCGAATG | 233390..233409 | 94 |
| oES2400_unitig**24**_R | TTTGCGAAGACGCCAGAAAC | 233483..233464 |
| oES2401_unitig**27**_F | CGTAGCGGTAGGAGTATTCG | 265475..265494 | 159 |
| oES2402_unitig**27**_R | CGGCTACTTACTAGGCCTTC | 265633..265614 |
| oES2403_unitig**49**_F | GATGCTGACCGGTATCATGG | 300139..300158 | 269 |
| oES2404_unitig**49**_R | CAGCAACAGGTGCATTAGTG | 300407..300388 |
| oES2405_unitig**51**_F | AACTTCGTCCACAGTCCTAC | 71090..71109 | 350 |
| oES2406_unitig**51**_R | GAAGCTACATCGGGTGATTC | 71439..71420 |
| oES2407_unitig**99**_F | TGTGAACCCGCAATGATCCC | 137946..137965 | 420 |
| oES2408_unitig**99**_R | GGCGTTGAGCAGACCTGTAG | 138365..138346 |
| oES2409_unitig**112**_F | ACCTCGCGTGAAGATGTAAG | 89655..89674 | 491 |
| oES2410_unitig**112**_R | CTGCGCCAGAGTTGAAAGTC | 90145..90126 |
| **Probes for Southern analyses** |  |  |  |
| oES3018_Chr**17**_F | GACGGGATCTATGCTACAGG | 210784..210803 | 1515 |
| oES3019_Chr**17**_R | ACCGCACCGTTGGCTATTTG | 212298..212279 |
| oES3020_Chr**21**_F | GCTTCTTCCCAGCATCTGAC | 276789..276808 | 1597 |
| oES3021_Chr**21**_R | CGGAAGCACAGGCAATATCG | 278385..278366 |
| oES3022_Chr**12**_F | TAGACCCGGTCTGGAGAATC | 804683..804702 | 1519 |
| oES3023_Chr**12**_R | TCGACTTCGGGTGACTTGAG | 806201..806182 |
